# Supplementary material for: Rapid visual detection assay for Bactrocera dorsalis (Hendel) based on RPA-CRISPR/Cas12b
Source: Research Square preprint supplement (doi:10.21203/rs.3.rs-5481298/v1), 2025-04-11
Supplement: Supplementary file 1 [file f2b93438abae1d812c9adb28.docx]

**Supplementary Table S1.** The fly samples of different geographical strains

| **Species** | **Collection sites** | **Stage** | **Qualities** |
| --- | --- | --- | --- |
| *Bactrocera dorsalis* | Guangdong-Guangzhou China (23.04 °N, 113.52 °E) | Adults | 95 |
| Guangxi-Nanning, China (23.13 °N, 108.22 °E) | 62 |
| Guangxi-Dongxing, China (21.31 °N, 107.85 °E) | 64 |
| Yunnan-Jinghong, China (21.59 °N, 100.47 °E) | 33 |
| Zhejiang-Hangzhou, China (30.22 °N, 120.11 °E) | 10 |
| Hainan-Haikou, China (19.96 °N, 110.22 °E) | 33 |
| Vietnam (21.96 °N, 106.62 °E) | 22 |
| *Bactrocera correcta* | Yunnan-Jinghong, China (21.59 °N, 100.47 °E) | 10 |
| *Zeugodacus cucurbitae* | Guangdong-Guangzhou China (23.04 °N, 113.52 °E) | 21 |
| *Zeugodacus tau* | Guangdong-Guangzhou China (23.04 °N, 113.52 °E) | 13 |
| *Zeugodacus scutellata* | Guangxi-Nanning, China (23.11 °N, 108.17 °E) | 51 |
| Guangxi-Pingxiang, China (22.05 °N, 106.44 °E) | 55 |
| *Bactrocera rubiginus* | Guangxi-Nanning, China (23.10 °N, 108.22 °E) | 10 |

**Supplementary Table S2.** The fly samples of Chinese Academy of Inspection and Quarantine

| **Species** | **Generations** | **Stages** | **Qualities** |
| --- | --- | --- | --- |
| *Bactrocera dorsalis* | 18 | Eggs | ≈300 |
| Larvae | 106 |
| Pupae | 102 |
| Adults | 135 |
| *Bactrocera correcta* | 8 | Eggs | ≈200 |
| Larvae | 116 |
| Pupae | 100 |
| Adults | 123 |
| *Zeugodacus cucurbitae* | 8 | Eggs | ≈100 |
| Larvae | 4 |
| Pupae | 111 |
| Adults | 97 |
| *Zeugodacus tau* | 24 | Eggs | ≈200 |
| Larvae | 3 |
| Pupae | 97 |
| Adults | 43 |

| **a** |
| --- |
| 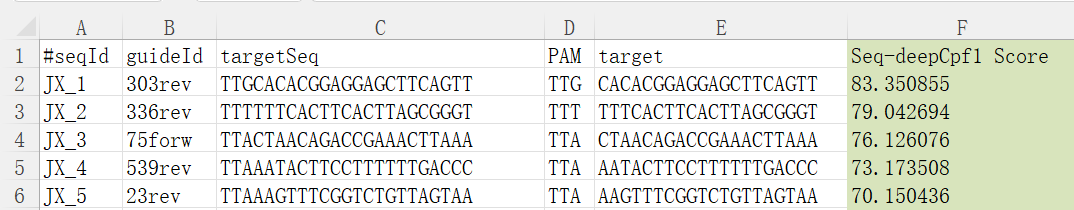 |
| **b** |
| 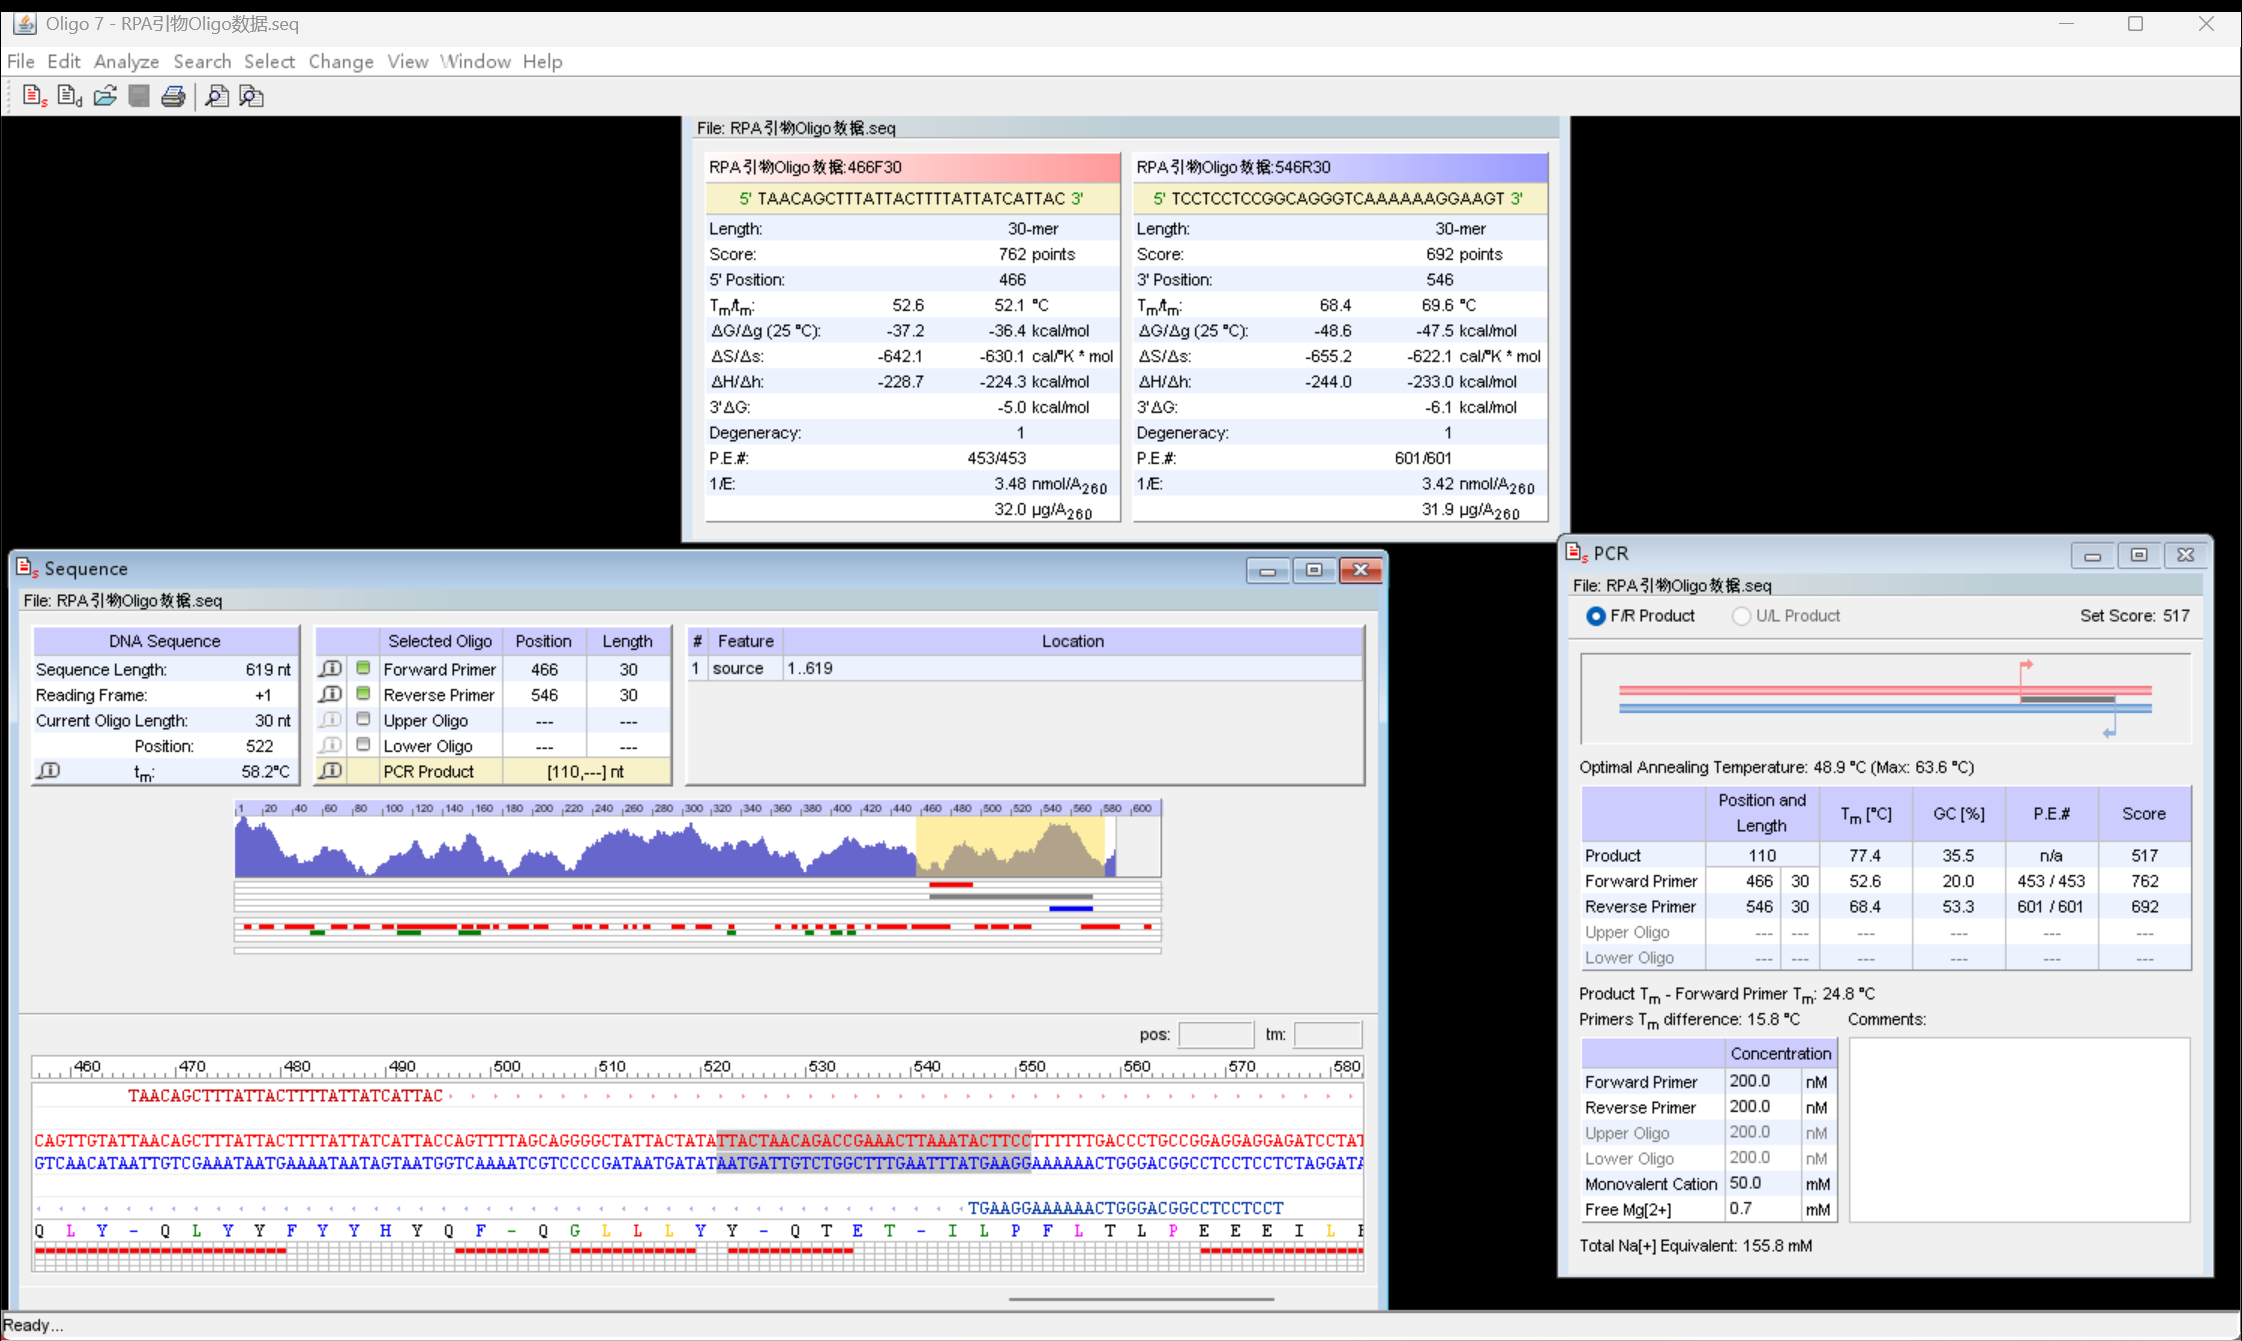 |

**Supplementary Figure S1.** The sequences screening results of localized CRISPOR tool and Oligo_v7.65. (**a**) Five specific target sequences that can be recognized by gRNAs were screened out by CRISPOR and arranged in descending order of scores. (**b**) The detailed information of the Oligo_v7.65 interface when screening RPA primers


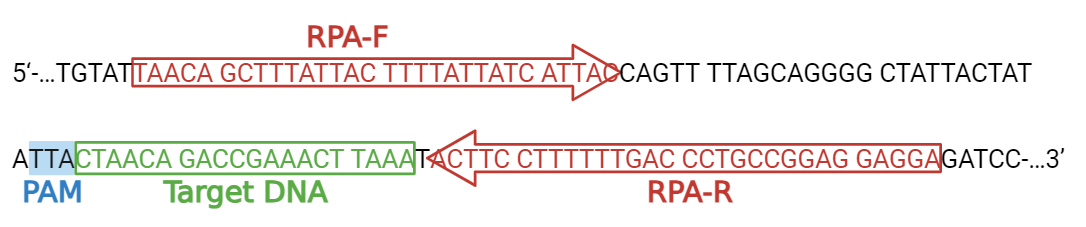


**Supplementary Figure S2.** RPA primers and gRNA binding sites on the mitochondrial sequences of *B. dorsalis*

**Supplementary Table S3.** The NCBI accession numbers of the plasmid of fruit fly.

| **Species** | **NCBI GenBank ID** |
| --- | --- |
| *Zeugodacus cucurbitae* | NC_016056.1 |
| *Trypeta fujianica* | AY788426.1 |
| *Bactrocera proprediaphora* | KJ753951.1 |
| *Ceratitis rubivora* | AY788438.1 |
| *Ceratitis rosa* | AY788437.1 |
| *Bactrocera correcta* | DQ116264.1 |
| *Ceratitis capitata* | HQ677176.1 |
| *Bactrocera incisa* | KJ753941.1 |
| *Bactrocera ruiliensis* | KJ753925.1 |
| *Zeugodacus tau* | KJ753947.1 |

**Supplementary Table S4.** The relevant information of the fruit fly samples selected for different experiments

| **Experients** | **Species** | **Stages** | **DNA extraction method** |
| --- | --- | --- | --- |
| Probe concentration optimization experiment | *Bactrocera dorsalis* | Larvae | Silica spin column-based DNA extraction |
| RPA and CRISPR time optimization experiment |
| Sensitivity detection experiment |
| Specificity detection experiment | *Bactrocera correcta* | Eggs, larvae, pupae and adults | Rapid on-site DNA extraction |
| *Zeugodacus cucurbitae* | Eggs, larvae, pupae and adults |
| *Zeugodacus tau* | Eggs, larvae, pupae and adults |
| *Zeugodacus scutellata* | Eggs, larvae, pupae and adults |
| *Bactrocera rubiginus* | Eggs, larvae, pupae and adults |
| Detection experiment of different geographical strains | *Bactrocera dorsalis* | Eggs, larvae, pupae and adults |
| Detection experiment of different insect stages | *Bactrocera dorsalis* | Eggs, larvae, pupae and adults |
| Single egg detection experiment | *Bactrocera dorsalis* | An egg |

**Supplementary Table S5.** Other gRNA sequences and RPA primers designed through the localized CRISPOR tool and Oligo 7 software

| gRNA1 | GUCUAAAGGACAGAUUUUCAACGGGUGUGCCAAUGGCCACUUUCCAGGUGGCAAAGCCCGUUGAACUUCAAGCGAAGUGGCACCACACGGAGGAGCUUCAGUU |
| --- | --- |
| gRNA2 | GUCUAAAGGACAGAUUUUCAACGGGUGUGCCAAUGGCCACUUUCCAGGUGGCAAAGCCCGUUGAACUUCAAGCGAAGUGGCACUUUCACUUCACUUAGCGGGU |
| gRNA4 | GUCUAAAGGACAGAUUUUCAACGGGUGUGCCAAUGGCCACUUUCCAGGUGGCAAAGCCCGUUGAACUUCAAGCGAAGUGGCACAAUACUUCCUUUUUUGACCC |
| gRNA5 | GUCUAAAGGACAGAUUUUCAACGGGUGUGCCAAUGGCCACUUUCCAGGUGGCAAAGCCCGUUGAACUUCAAGCGAAGUGGCACAAGUUUCGGUCUGUUAGUAA |
| RPA-F2 | TGTATTAACAGCTTTATTACTTTTATTATC |
| RPA-R2 | AAGAATAGGATCTCCTCCTCCGGCAGGGTC |
| RPA-R3 | GATCTCCTCCTCCGGCAGGGTCAAAAAAGG |

**Supplementary Table S6.** Comparison of single-reaction costs for RPA-CRISPR/Cas12b and other methods for detection of *B. dorsalis*

| **RPA-CRISPR/Cas 12b** | | **RAPD** | | **RFLP** | |
| --- | --- | --- | --- | --- | --- |
| Component | Single-reaction Costs ($) | Component | Single-reaction Costs ($) | Component | Single-reaction Costs ($) |
| DNA/RNA constant-temperature rapid amplification kit | 2.57 | Taq DNA Polymerase | 0.46-0.69 | Restriction Endonuclease | 0.43-0.71 |
| AaCas12b protein | 2.85 | Primers | 0.003-0.007 | Agarose Gel Electrophoresis | 0.07-0.08 |
| gRNA | 0.18 | dNTP Mix | 0.02-0.04 | Buffer | 0.09-0.3 |
| Primers | 0.036 | MgCl₂ | 0.04 |  |  |
| ssDNA reporter | 0.27 | Agarose Gel Electrophoresis Kit | 0.04-0.06 |  |  |
| ddH2O | 4 × 10-4 | Buffer | 0.02-0.17 |  |  |
| Total | ≈5.906 | Total | 0.58-1.01 | Total | 0.59-1.09 |
